# Supplementary material for: Transmission prevention behaviors in US households with SARS-CoV-2 cases in 2020
Source: PubMed Central journal article supplement — medRxiv. 2022 Nov 27:2022.11.25.22282730. Preprint. [Version 1] doi: 10.1101/2022.11.25.22282730 (PMC9709803; doi:10.1101/2022.11.25.22282730), 2022-11-27
Supplement: NIHPP2022.11.25.22282730V1-supplement-1.pdf [file NIHPP2022.11.25.22282730V1-supplement-1.pdf]

422 **SUPPLEMENTAL MATERIAL:**

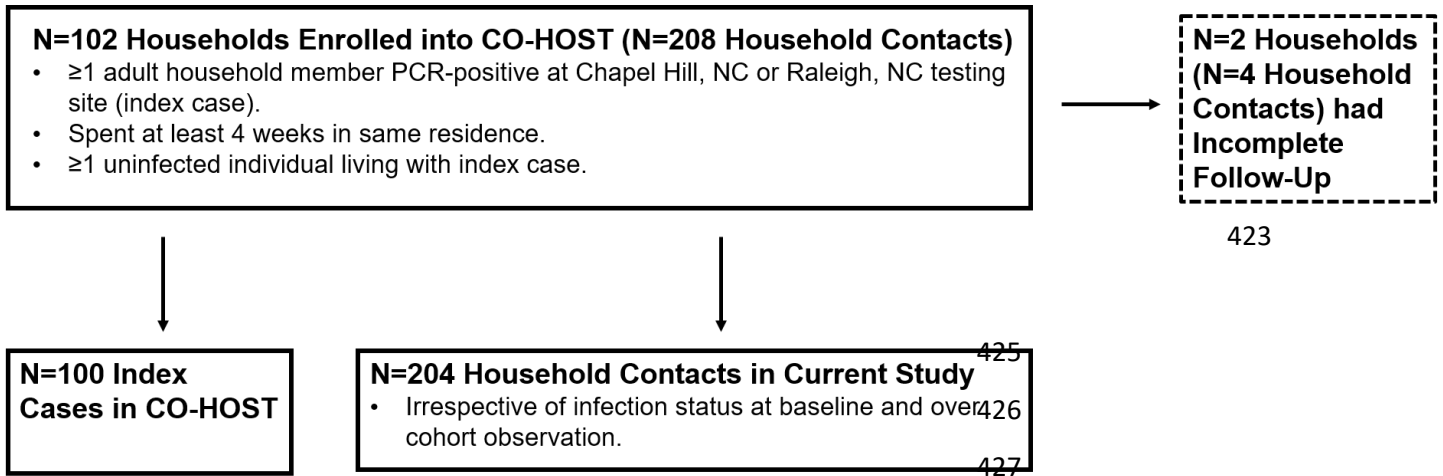

428 **Figure S1.** Inclusion diagram. CO-HOST refers to the parent study from which this secondary analysis is  
429 derived. 2 households consisting of 2 index cases and 4 household contacts were unable to be included in this  
430 study due to insufficient follow up. This study utilized the 204 remaining household contacts.  
431  
432  
433  
434  
435  
436  
437  
438  
439  
440  
441  
442  
443  
444  
445  
446  
447  
448  
449  
450

It is made available under a [CC-BY-NC 4.0 International license](https://creativecommons.org/licenses/by-nc/4.0/) .

**Mask Use Inside Home at Day 14**  
Prevalence Ratio and 95% CI

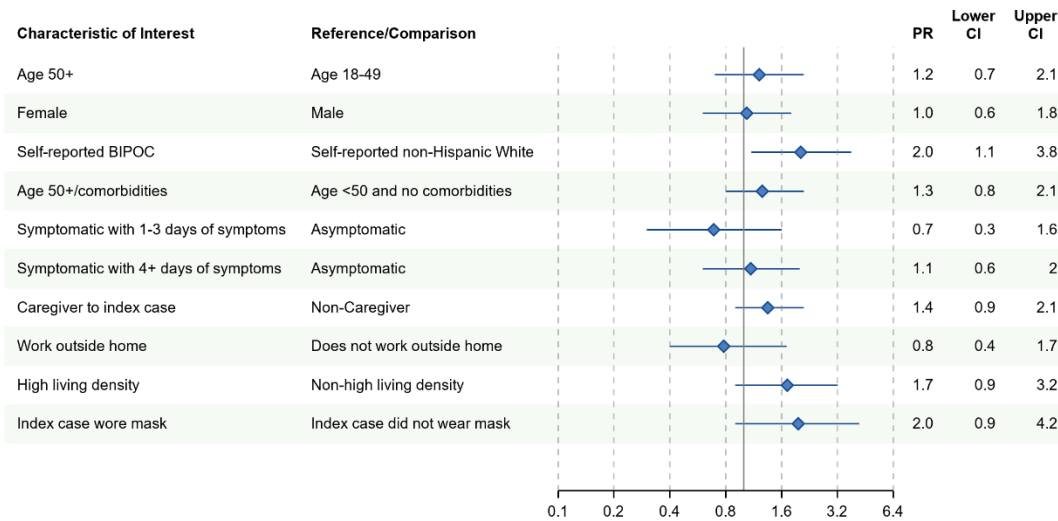

451

452 **Figure S2.** Bivariate sensitivity analyses of factors associated with using a mask at home at any time at Day  
 453 14 of cohort participation. Solid dots (PR) and solid lines (95% CI) display imputed estimates using chained  
 454 multiple imputation for clustered data. PR and 95% CI graphed on the natural log scale. Vertical solid line  
 455 denotes the null value of the PR (PR=1.0) on the exponentiated scale. X-axis labels correspond to the  
 456 exponentiated scale. BIPOC=Black, Indigenous, People of Color. Table denotes the PR, lower 95% CI and  
 457 upper 95% CI.

458

459

460

461

462

463

464

465

466

467

468

469

470

471

472

473

474

475

It is made available under a [CC-BY-NC 4.0 International license](https://creativecommons.org/licenses/by-nc/4.0/) .

**Shared Bedroom with Index Case Between Days 7-14**  
Prevalence Ratio and 95% CI

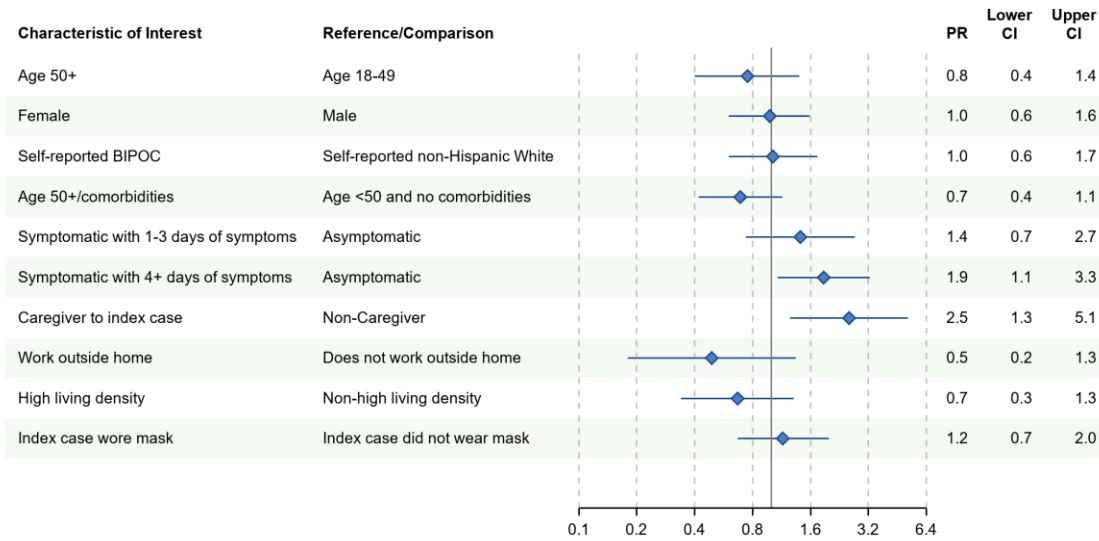

**Figure S3.** Bivariate sensitivity analyses of factors associated with sharing a bedroom with the index case at any time between Days 7-14 of cohort participation. Solid dots (PR) and solid lines (95% CI) display imputed estimates using chained multiple imputation for clustered data. PR and 95% CI graphed on transformed natural log scale. Vertical solid line denotes the null value of the PR (PR=1.0) on the exponentiated scale. X-axis labels correspond to the exponentiated scale. BIPOC=Black, Indigenous, People of Color. Table denotes the PR, lower 95% CI and upper 95% CI.

It is made available under a [CC-BY-NC 4.0 International license](https://creativecommons.org/licenses/by-nc/4.0/) .

**Table S1.** Number and proportion of household contacts engaging in reported behaviors at study entry and Day 14. P-values were calculated using Yang's test for changes between Day 0-14 on complete cases. 85 participants were missing 'masking at home' responses and 119 were evaluable. 41 participants were missing responses for all other variables and 163 participants were evaluable. See Figure 1 in main text.

| <b>Behavior</b>          | <b>N (%) Household Contacts Reporting at Cohort Entry</b> | <b>N (%) Household Contacts Reporting at Day 14</b> | <b>P-value</b> |
|--------------------------|-----------------------------------------------------------|-----------------------------------------------------|----------------|
| Share kitchen            | 148 (91)                                                  | 124 (76)                                            | 0.003          |
| Eat together             | 111 (68)                                                  | 90 (55)                                             | 0.013          |
| Share bathroom           | 105 (65)                                                  | 92 (56)                                             | 0.066          |
| Watch TV together        | 103 (63)                                                  | 89 (55)                                             | 0.068          |
| Share car rides          | 101 (62)                                                  | 66 (41)                                             | <0.001         |
| Share electronic devices | 65 (40)                                                   | 54 (33)                                             | 0.092          |
| Share bedroom            | 58 (36)                                                   | 44 (27)                                             | 0.015          |
| Masking at home          | 28 (24)                                                   | 31 (26)                                             | 0.614          |

It is made available under a [CC-BY-NC 4.0 International license](https://creativecommons.org/licenses/by-nc/4.0/) .

**Table S2.** Number (row %) of household contacts living in high density households among self-reported race/ethnicity and masking behavior.

| <b>Mask Use Inside Home Between Days 7-14</b> | <b>Race/Ethnicity</b>     | <b>High Living Density</b> |           |              |
|-----------------------------------------------|---------------------------|----------------------------|-----------|--------------|
|                                               |                           | <b>Yes</b>                 | <b>No</b> | <b>Total</b> |
| <b>Yes</b>                                    | <b>Non-Hispanic White</b> | 2 (13)                     | 13 (87)   | 15 (100)     |
|                                               | <b>BIPOC</b>              | 12 (57)                    | 9 (43)    | 21 (100)     |
| <b>No</b>                                     | <b>Non-Hispanic White</b> | 7 (10)                     | 61 (90)   | 68 (100)     |
|                                               | <b>BIPOC</b>              | 14 (54)                    | 12 (46)   | 26 (100)     |

551  
552  
553  
554  
555  
556  
557  
558  
559  
560  
561  
562  
563  
564  
565  
566  
567  
568  
569  
570  
571  
572  
573  
574  
575  
576

It is made available under a [CC-BY-NC 4.0 International license](https://creativecommons.org/licenses/by-nc/4.0/) .

577  
578  
579

**Table S3.** Number (%) of household contacts living in high density households among self-reported race/ethnicity and bedroom sharing with index case.

| Shared Bedroom with Index Case Between Days 7-14 | Race/Ethnicity     | High Living Density |         |          | 580 |
|--------------------------------------------------|--------------------|---------------------|---------|----------|-----|
|                                                  |                    | Yes                 | No      | Total    | 581 |
| Yes                                              | Non-Hispanic White | 1 (4)               | 27 (96) | 28 (100) | 582 |
|                                                  | BIPOC              | 8 (53)              | 7 (47)  | 15 (100) | 583 |
| No                                               | Non-Hispanic White | 10 (14)             | 64 (87) | 74 (100) | 584 |
|                                                  | BIPOC              | 21 (47)             | 24 (53) | 45 (100) | 585 |

It is made available under a [CC-BY-NC 4.0 International license](https://creativecommons.org/licenses/by-nc/4.0/) .

587  
588

**Table S4.** Frequency and prevalence of household contacts who reported ever masking or ever sharing a bedroom with the index case between Days 7-14 of cohort participation.

| <b>Outcome:</b>                                                          | <b>Mask Use Inside the Home</b> |                   | <b>Sharing a Bedroom</b> |                   |
|--------------------------------------------------------------------------|---------------------------------|-------------------|--------------------------|-------------------|
| <b>Household-Contact Characteristics</b>                                 | <b>N</b>                        | <b>Prevalence</b> | <b>N</b>                 | <b>Prevalence</b> |
| Age (restricted to 18 and older)                                         |                                 |                   |                          |                   |
| 18-49 (ref)                                                              | 16                              | 0.26              | 24                       | 0.33              |
| 50+                                                                      | 9                               | 0.36              | 8                        | 0.24              |
| Sex                                                                      |                                 |                   |                          |                   |
| Male (ref)                                                               | 15                              | 0.26              | 20                       | 0.27              |
| Female                                                                   | 21                              | 0.29              | 24                       | 0.27              |
| Race/Ethnicity                                                           |                                 |                   |                          |                   |
| Non-Hispanic White                                                       | 15                              | 0.18              | 28                       | 0.27              |
| Participants of Color                                                    | 21                              | 0.45              | 16                       | 0.26              |
| Aged 50 or older or any comorbidities <sup>a</sup>                       |                                 |                   |                          |                   |
| No                                                                       | 12                              | 0.21              | 24                       | 0.35              |
| Yes                                                                      | 24                              | 0.35              | 19                       | 0.22              |
| Missing                                                                  | 6                               |                   | 6                        |                   |
| Duration of COVID-19 Symptoms <sup>b</sup>                               |                                 |                   |                          |                   |
| No symptoms                                                              | 20                              | 0.18              | 18                       | 0.16              |
| 1-3 days                                                                 | 5                               | 0.16              | 8                        | 0.26              |
| 4 or more days                                                           | 7                               | 0.22              | 12                       | 0.38              |
| Missing                                                                  | 28                              |                   | 28                       |                   |
| Caregiver to index case <sup>b</sup> (restricted to 18 and older)        |                                 |                   |                          |                   |
| No                                                                       | 10                              | 0.24              | 7                        | 0.15              |
| Yes                                                                      | 15                              | 0.34              | 23                       | 0.47              |
| Missing                                                                  | 0                               |                   | 2                        |                   |
| Work outside home on most days <sup>b</sup> (restricted to 18 and older) |                                 |                   |                          |                   |
| No                                                                       | 22                              | 0.32              | 29                       | 0.33              |
| Yes                                                                      | 3                               | 0.17              | 3                        | 0.16              |
| Live in household with high living density                               |                                 |                   |                          |                   |
| No                                                                       | 22                              | 0.16              | 35                       | 0.29              |
| Yes                                                                      | 14                              | 0.22              | 9                        | 0.21              |
| Missing                                                                  | 74                              |                   | 0                        |                   |
| Index case wore mask <sup>b</sup> (include all age groups)               |                                 |                   |                          |                   |
| No                                                                       | 4                               | 0.09              | 15                       | 0.25              |
| Yes                                                                      | 32                              | 0.37              | 27                       | 0.27              |
| Missing                                                                  | 0                               |                   | 3                        |                   |

589  
590  
591  
592  
593  
594  
595  
596  
597

a We considered individuals aged 50 or older or those with at least one comorbidity to be at higher risk for severe COVID-19 infection. If the household contact was the only member of their household with higher risk for severe COVID-19 infection, they were placed in the reference group. Household contacts who resided in households in which some members were not enrolled in COHOST, and where there were no known household members over aged 50 or with comorbidities, were coded as missing.

b Between days 7-14 of cohort observation
